# Supplementary material for: Highly Efficient CYP167A1 (EpoK) dependent Epothilone B Formation and Production of 7-Ketone Epothilone D as a New Epothilone Derivative
Source: PubMed Central journal article supplement (PMC4597204; doi:10.1038/srep14881), 2015-10-08
Supplement: srep14881-s1.pdf [file srep14881-s1.pdf]

## SUPPORTING INFORMATION

Highly efficient CYP167A1 (EpoK) dependent epothilone B formation and production of 7-ketone epothilone D as a new epothilone derivative

**Fredy Kern<sup>1</sup>, Tobias K. F. Dier<sup>2</sup>, Yogan Khatri<sup>1</sup>, Kerstin M. Ewen<sup>1</sup>, Jean-Pierre Jacquot<sup>3</sup>, Dietrich A. Volmer<sup>2</sup> and Rita Bernhardt<sup>1</sup>**

<sup>1</sup>From the Department of Biochemistry, Saarland University, 66123 Saarbrücken, Germany

<sup>2</sup>Institute of Bioanalytical Chemistry, Saarland University, 66123 Saarbrücken, Germany

<sup>3</sup>Unité Mixte de Recherches, 1136 Interaction arbres microorganismes INRA, Nancy University, 54506 Vandoeuvre-lès-Nancy cedex, France

To whom correspondence should be addressed: Rita Bernhardt, Department of Biochemistry, Saarland University, 66123 Saarbrücken, Germany, Tel.: +49 (0)681 302 4241; Fax: +49 (0)681 302 4739; E-mail: ritabern@mx.uni-saarland.de

*Molecular extinction coefficients of ferredoxins and ferredoxin reductases* - The summarized extinction coefficients of ferredoxins and ferredoxin reductases expressed and purified in this study are listed in Table S0.

**Table S0.** Overview: molecular extinction coefficients of ferredoxins and ferredoxin reductases. (Values were taken from literature as referred in Table 1 and Table 2; results section)

| <b>Ferredoxin</b>    | <b>Organism</b>      | <b>Extinction coefficient [mM<sup>-1</sup> cm<sup>-1</sup>]</b> | <b>Reductase</b> | <b>Organism</b>                 | <b>Extinction coefficient [mM<sup>-1</sup> cm<sup>-1</sup>]</b> |
|----------------------|----------------------|-----------------------------------------------------------------|------------------|---------------------------------|-----------------------------------------------------------------|
| Adx <sub>4-108</sub> | <i>Bos taurus</i>    | $\epsilon_{414\text{nm}}$ : 9.8                                 | AdR              | <i>Bos taurus</i>               | $\epsilon_{450\text{nm}}$ : 11.3                                |
| Etp1 <sup>fd</sup>   | <i>S. pombe</i>      | $\epsilon_{414\text{nm}}$ : 9.8                                 | Arh1             | <i>S. pombe</i>                 | $\epsilon_{450\text{nm}}$ : 11.3                                |
| Fdx2                 | <i>S. cellulosum</i> | $\epsilon_{390\text{nm}}$ : 6.181                               | FdR_B            | <i>S. cellulosum</i><br>So ce56 | $\epsilon_{457\text{nm}}$ : 8.73                                |
| Fdx8                 | <i>So ce56</i>       | $\epsilon_{400\text{nm}}$ : 9.7                                 |                  |                                 |                                                                 |
| SynFdx               | <i>Synechocystis</i> | $\epsilon_{422\text{nm}}$ : 9.7                                 | FNR              | <i>C. reinhardtii</i>           | $\epsilon_{450\text{nm}}$ : 11.3                                |

**Structure of products** - During this study, 4 new P450-derived epothilone D derivatives were found and characterized via LC-MS/MS. An overview of the chemical structures is presented in Figure S1.

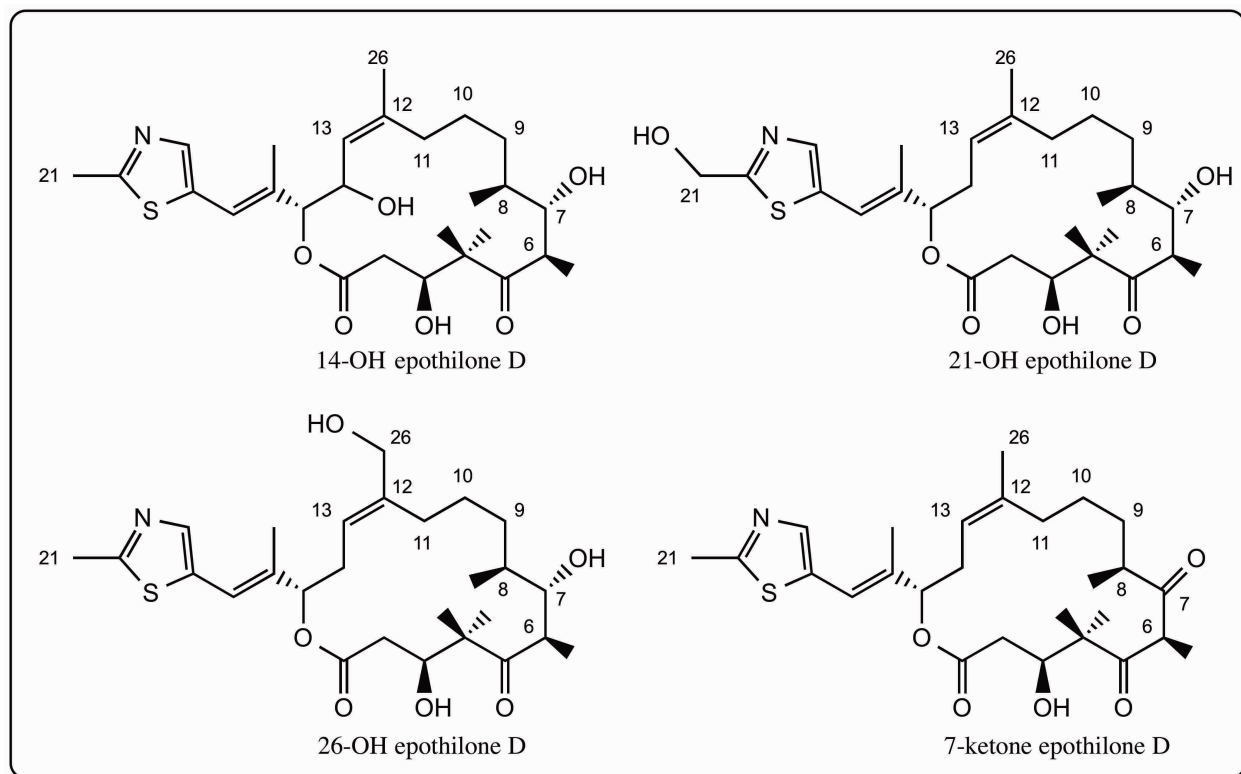

**Figure S1.** Overview of major epothilone D products formed by myxobacterial P450s from *S. cellulosum* So ce56 (CYP265A1 and CYP266A1: 14-OH epothilone D; CYP267B1: 14-OH, 21-OH, 26-OH and 7-ketone epothilone D).

**LC-MS/MS data** - The chromatograms of LC-MS/MS experiments are presented in Figure S2. Products A and B are already labeled as 21-OH epothilone D as well as product C (14-OH epothilone D), product D (26-OH epothilone D) and product E (7-ketone epothilone D).

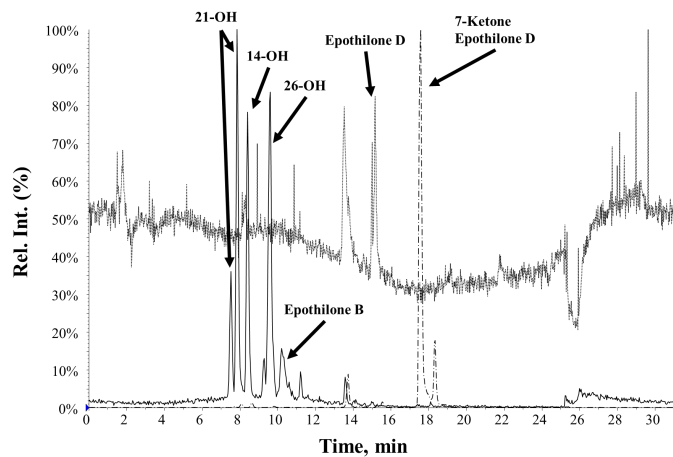

**Figure S2.** LC-MS/MS chromatograms of epothilone D conversion.

The MS/MS spectrum of the new epothilone derivative 7-ketone epothilone D is presented in Figure S3.

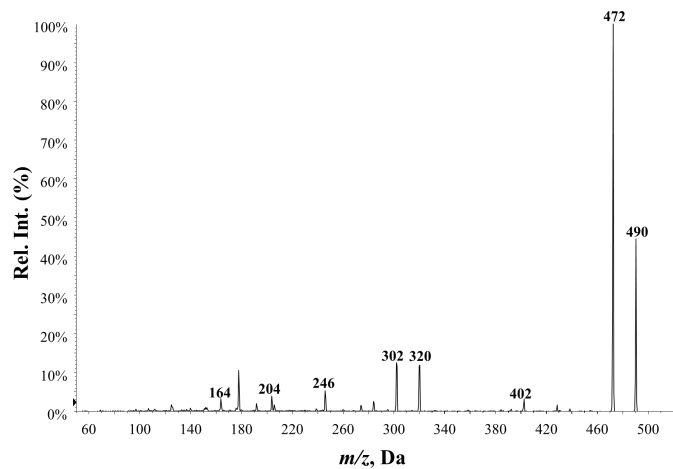

**Figure S3.** MS/MS spectrum of 7-ketone epothilone D.

An overview of the chemical structures assigned to the fragments observed in the LC-MS/MS spectra of the identified products is listed in Table S1. For further information on 7-ketone epothilone D, see Figure 5 in the discussion section.

**Table S1.** Overview of conversion products tentatively identified by LC-MS/MS (a: taken from <sup>37</sup>; \*: fragments observed in 14-OH, 21-OH, 26-OH and 7-ketone epothilone D MS/MS spectra; b: see Figure 5 in the manuscript for fragment structures).

| Name ( <i>m/z</i> of [M+H] <sup>+</sup> ) | Chemical structure                                                                  | MS <sup>2</sup> /CID product ions ( <i>m/z</i> )                                                                                                                                                                                                                                                                                                                                                                   |
|-------------------------------------------|-------------------------------------------------------------------------------------|--------------------------------------------------------------------------------------------------------------------------------------------------------------------------------------------------------------------------------------------------------------------------------------------------------------------------------------------------------------------------------------------------------------------|
| Epothilone B<br>(508)                     | 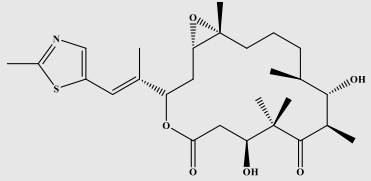   | 508-H <sub>2</sub> O (490) <sup>a*</sup> ; 490-H <sub>2</sub> O (472) <sup>*</sup> ; 508-C <sub>3</sub> H <sub>4</sub> O <sub>3</sub> (420) <sup>a*</sup> ; 420-H <sub>2</sub> O (402) <sup>*</sup> ; 508-C <sub>7</sub> H <sub>12</sub> O <sub>5</sub> (332) <sup>a*</sup> ; 508-C <sub>8</sub> H <sub>14</sub> O <sub>4</sub> (320) <sup>a*</sup> ; 320-H <sub>2</sub> O (302) <sup>a*</sup> ; 166 <sup>a*</sup> |
| 14-OH epothilone D<br>(508)               |    | 206<br>                                                                                                                                                                                                                                                                                                                         |
| 21-OH epothilone D<br>(508)               |   | 168<br>                                                                                                                                                                                                                                                                                                                        |
| 26-OH epothilone D<br>(508)               |  | 220<br>                                                                                                                                                                                                                                                                                                                       |
| 7-Ketone epothilone D<br>(490)            |  | 490-H <sub>2</sub> O (472) <sup>b</sup> ; 490-CO <sub>2</sub> ,C <sub>2</sub> H <sub>4</sub> O;<br>(402) <sup>b</sup> ; 320 <sup>b</sup> ; 246 <sup>b</sup> ; 204 <sup>b</sup> ; 164 <sup>b</sup>                                                                                                                                                                                                                  |

**Bioinformatic analysis of the putative Fdx2, Fdx8 and FdR\_B-like ferredoxins and ferredoxin reductase of *S. cellulosum* So0157-2** - Among UniProtKB Bacteria database, the Proteome of *Sorangium cellulosum* So0157-2 (GenBank: CP003969.1, length = 14782125) was found producing significant alignments with protein sequences of Fdx2, Fdx8 and FdR\_B from *S. cellulosum* So ce56 (NCBI BLAST+). Pairwise protein sequence alignments were performed using the Needleman-Wunsch algorithm (EMBL-EBI: Needle (EMBOSS)).

**Table S2.** Summarized alignment results of Fdx2, Fdx8 and FdR\_B from *S. cellulosum* So ce56 with *S. cellulosum* So0157-2.

| <b>Protein<br/>(So ce56)</b> | <b>Gene name in<br/>So0157-2</b>      | <b>Identity</b> | <b>Similarity</b> | <b>Gaps</b>    |
|------------------------------|---------------------------------------|-----------------|-------------------|----------------|
| Fdx2                         | SCE1572_46000<br>[4Fe-4S] ferredoxin  | 94/101 (93.1%)  | 98/101 (97.0%)    | 0/101 (0.0%)   |
| Fdx8                         | SCE1572_33470<br>Hypothetical protein | 86/110 (78.2%)  | 89/110 (80.9%)    | 11/110 (10.0%) |
| FdR_B                        | SCE1572_31190<br>Hypothetical protein | 227/245 (92.7%) | 235/245 (95.9%)   | 1/245 (0.4%)   |
